# Supplementary material for: Reorganization of Respiratory Descending Pathways following Cervical Spinal Partial Section Investigated by Transcranial Magnetic Stimulation in the Rat
Source: PubMed Central journal article supplement (PMC4734706; doi:10.1371/journal.pone.0148180), 2016-02-01

Individual raw values of diaphragm activity and MEP dia (average of 5 to 10 single MEP)

Sham animals

Rat #52

Ipsi

Contra

Diaphragm  
activity

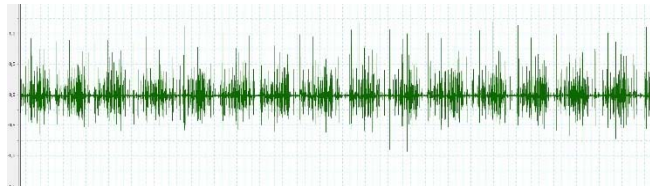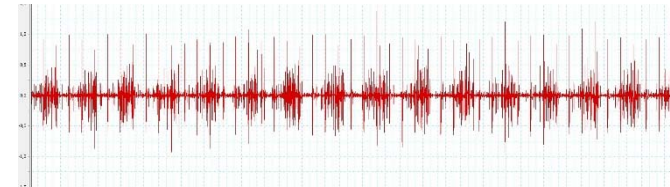

MEP dia

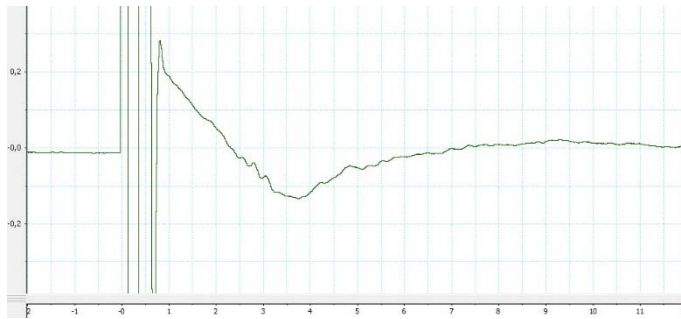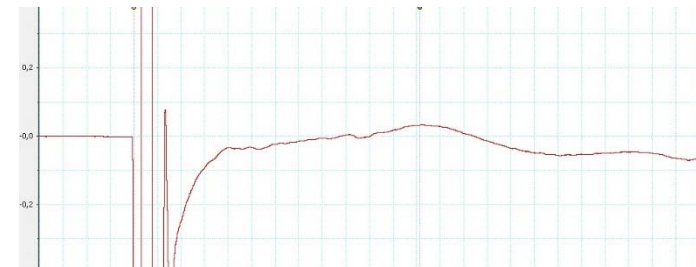

Sham animals

Rat #53

Ipsi

Contra

Diaphragm  
activity

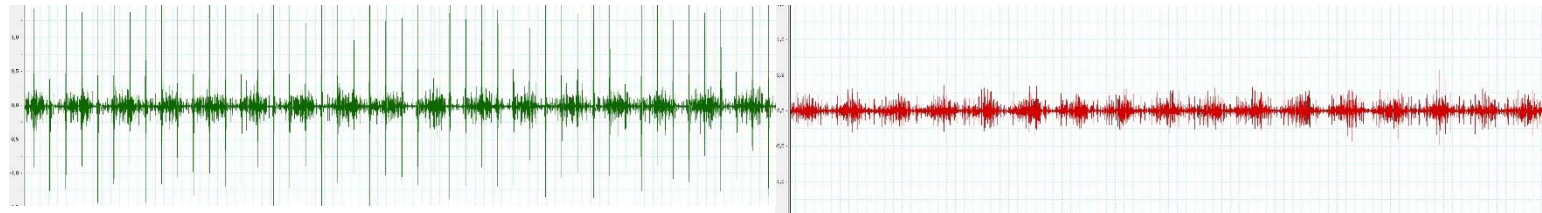

MEP dia

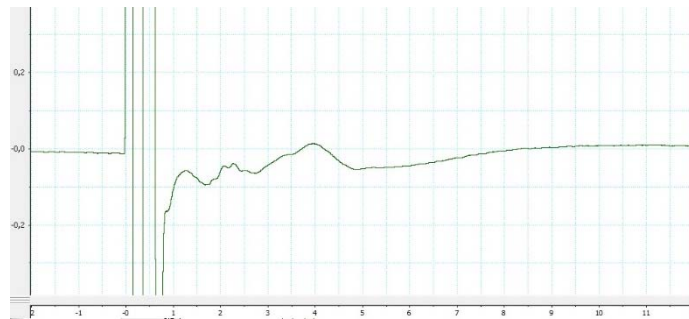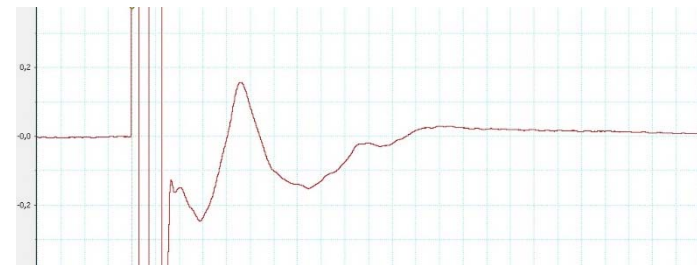

Sham animals

Rat #54

Ipsi

Contra

Diaphragm  
activity

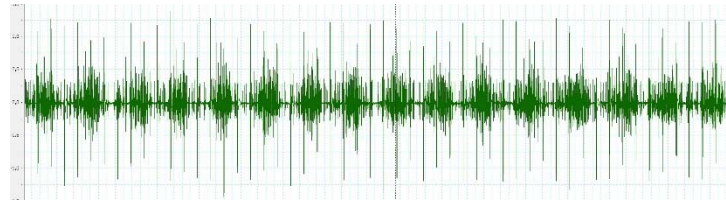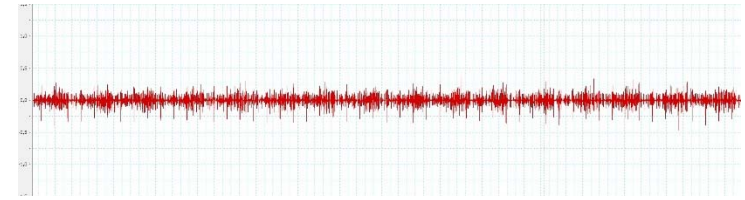

MEP dia

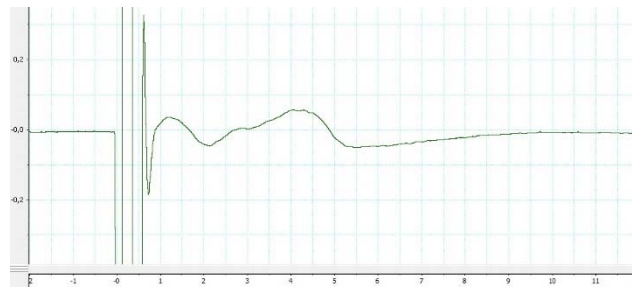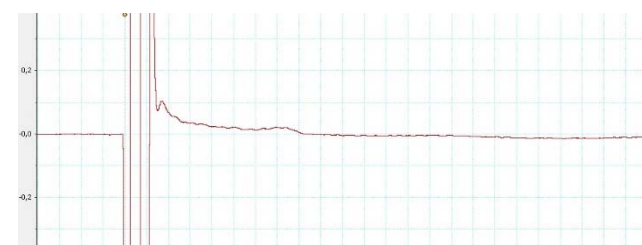

Sham animals

Rat #56

Ipsi

Contra

Diaphragm  
activity

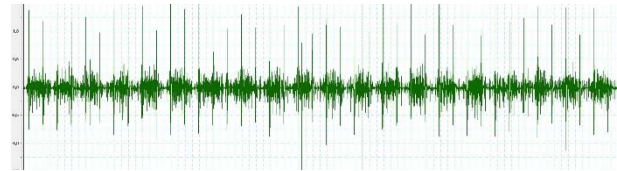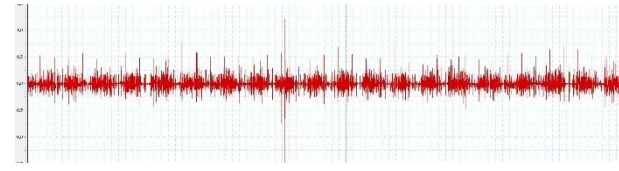

MEP dia

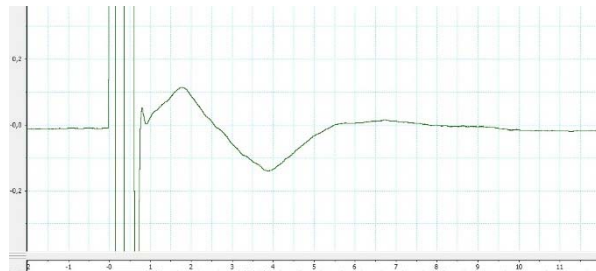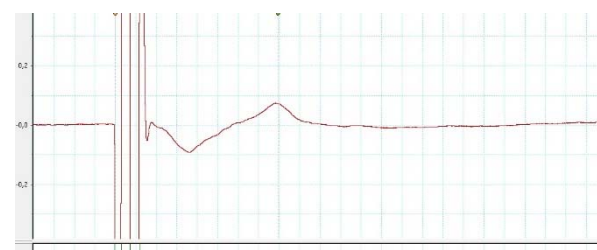

Sham animals

Rat #57

Ipsi

Contra

Diaphragm  
activity

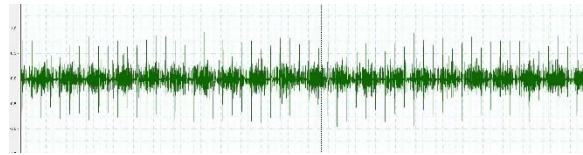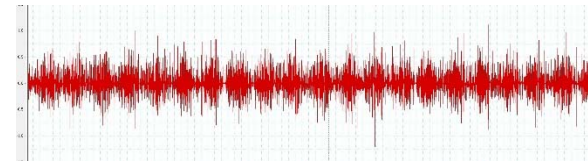

MEP dia

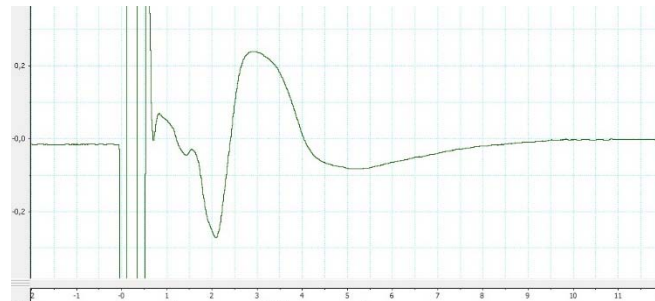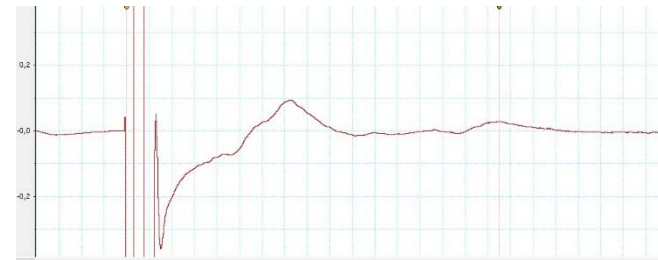

Sham animals

Rat #58

Ipsi

Contra

Diaphragm  
activity

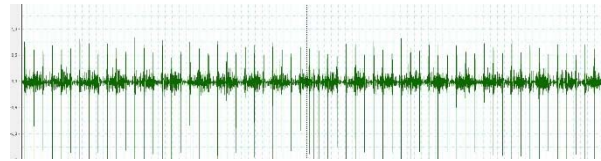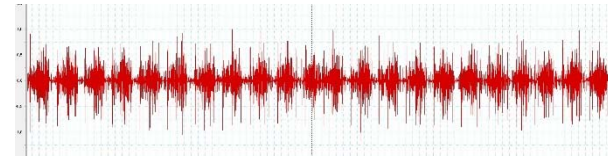

MEP dia

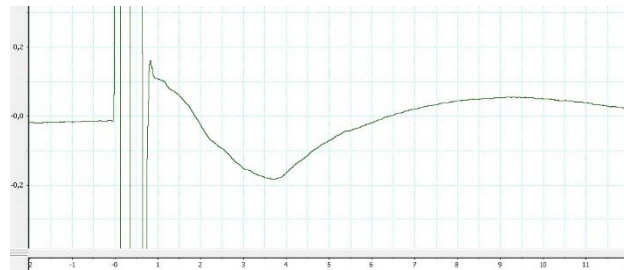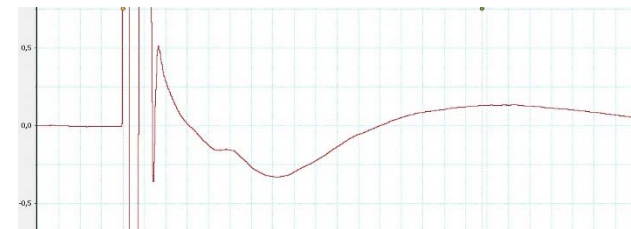

Sham animals

Rat #59

Ipsi

Contra

Diaphragm  
activity

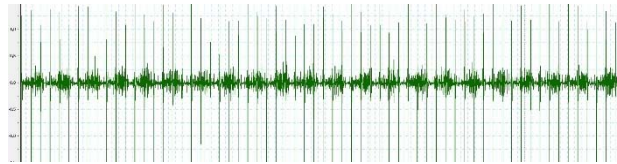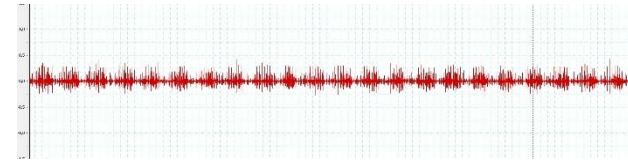

MEP dia

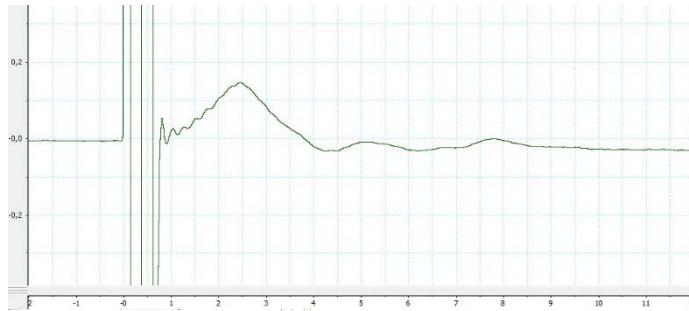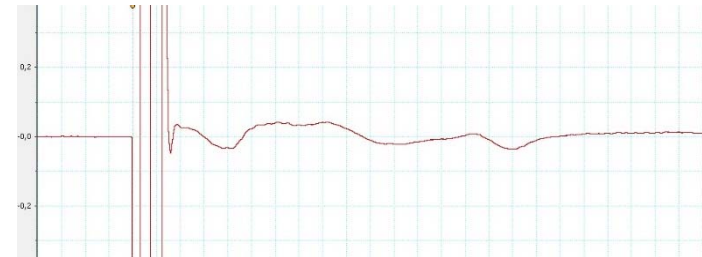



Sham animals

Rat #60

Ipsi

Contra

Diaphragm  
activity

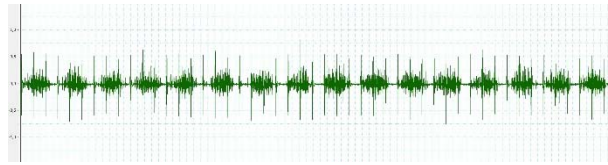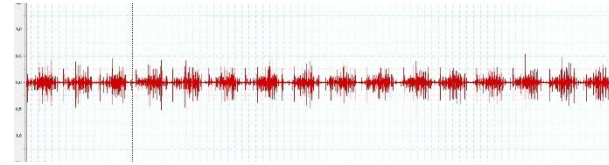

MEP dia

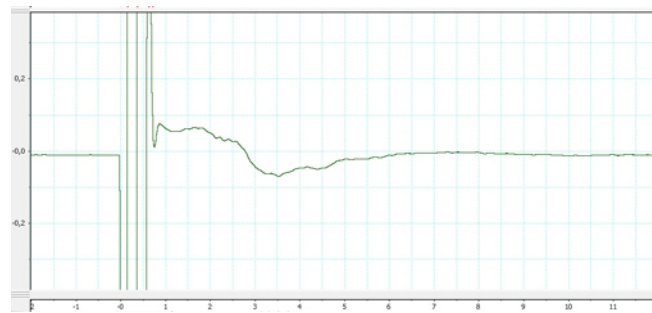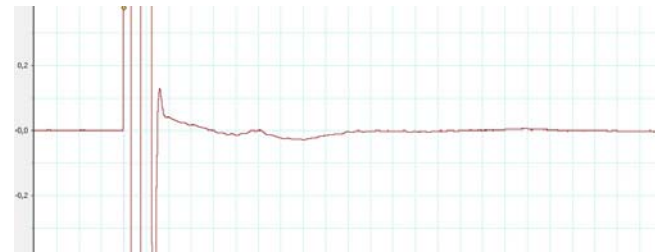

Sham animals

Rat #61

Ipsi

Contra

Diaphragm  
activity

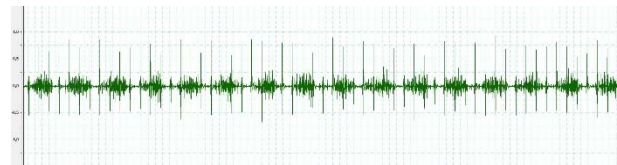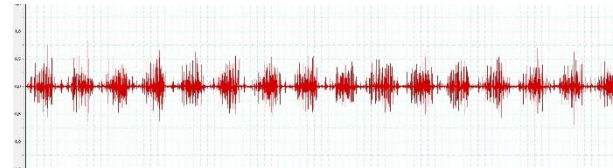

MEP dia

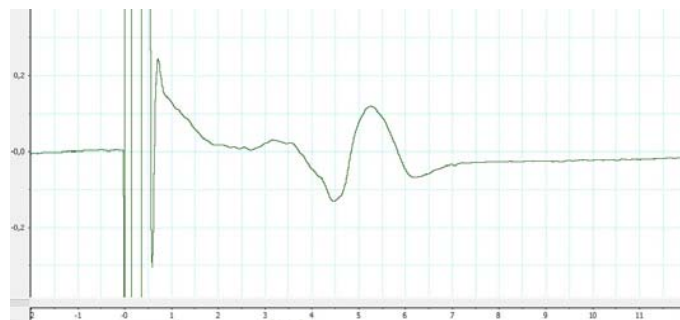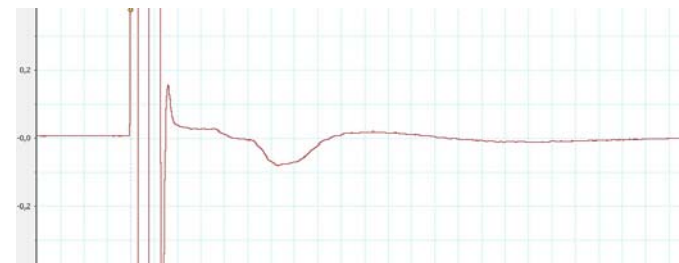

Sham animals

Rat #62

Ipsi

Contra

Diaphragm  
activity

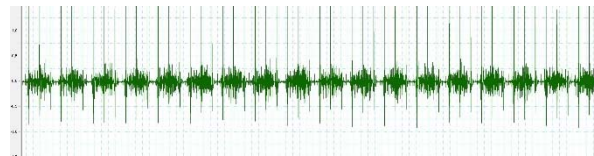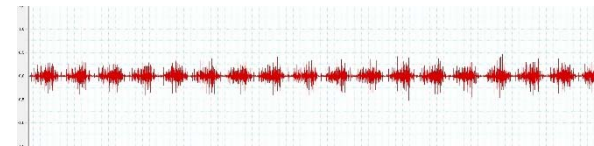

MEP dia

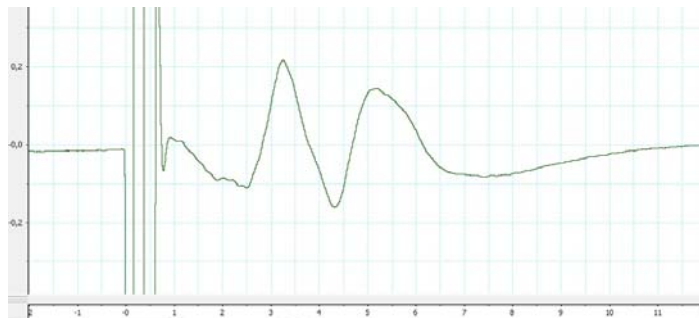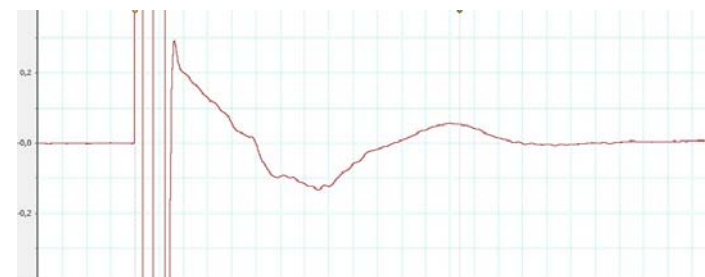

Sham animals

Rat #63

Ipsi

Contra

Diaphragm  
activity

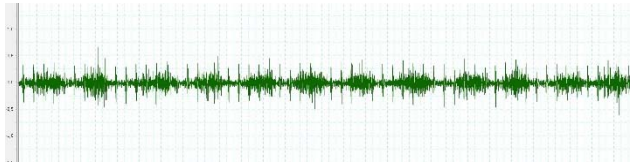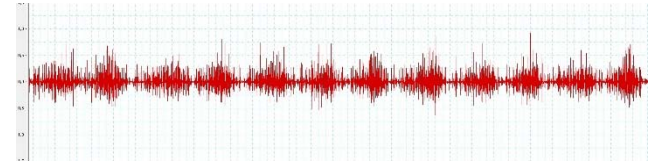

MEP dia

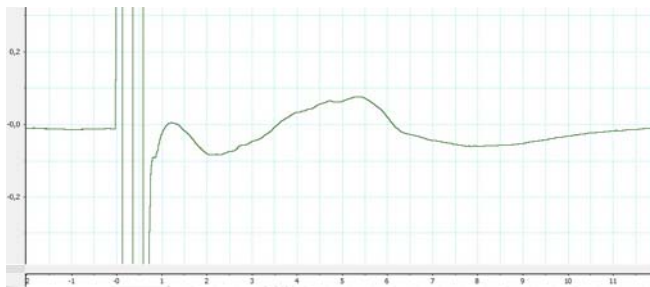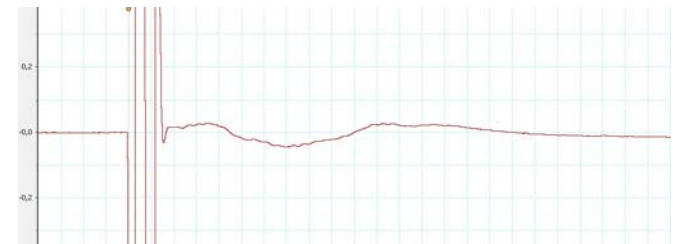

Sham animals

Rat #64

Ipsi

Contra

Diaphragm  
activity

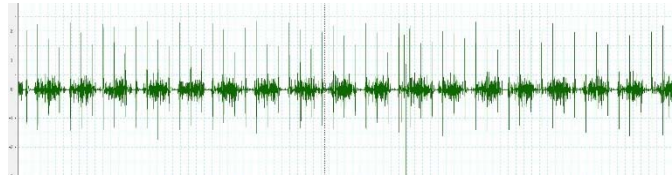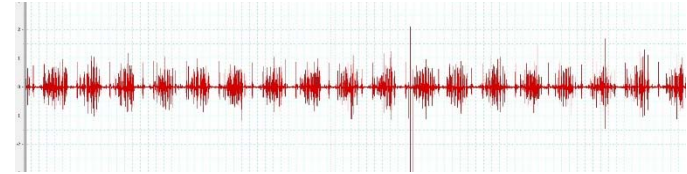

MEP dia

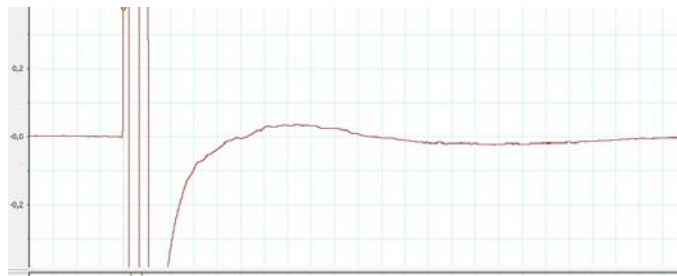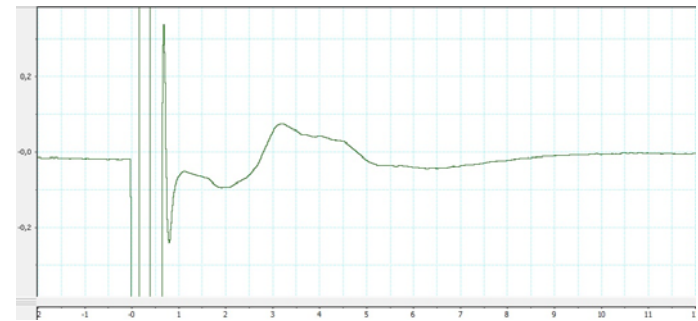

Sham animals

Rat #65

Ipsi

Contra

Diaphragm activity

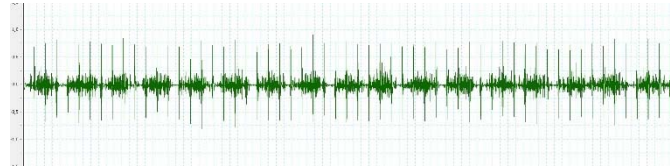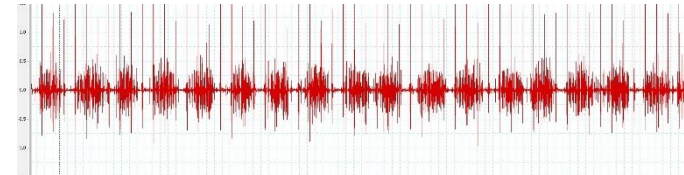

MEP dia

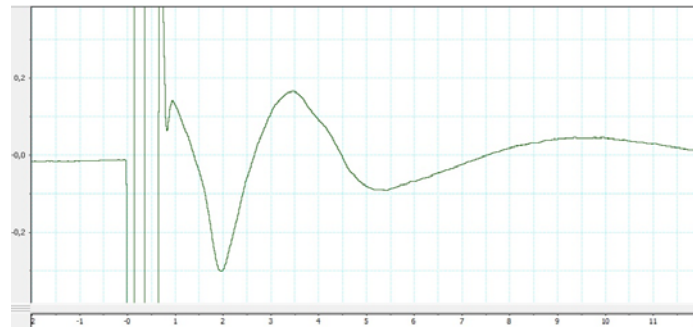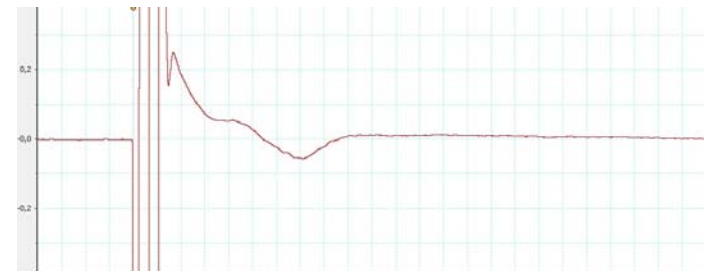

Sham animals

Rat #42

Ipsi

Contra

Diaphragm  
activity

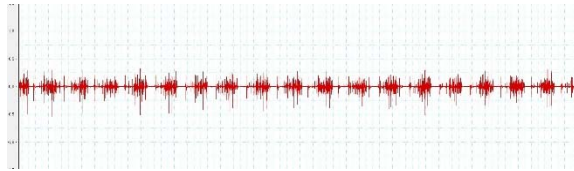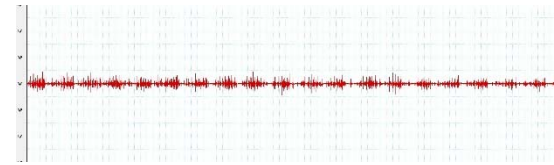

MEP dia

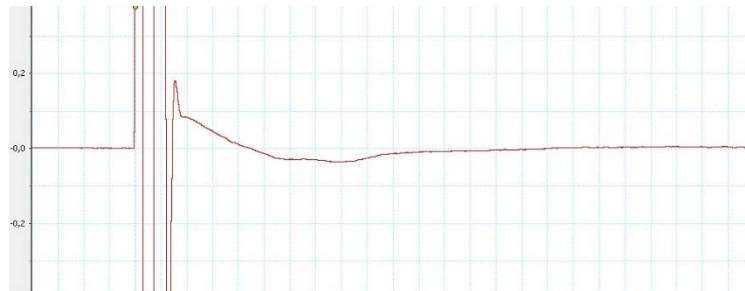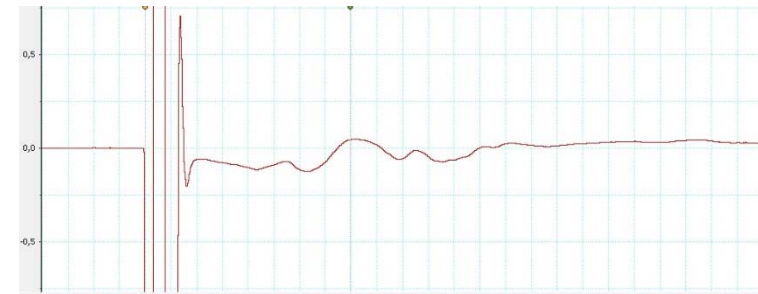

Sham animals

Rat #41

Ipsi

Contra

Diaphragm  
activity

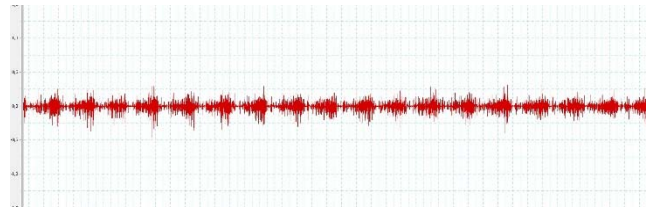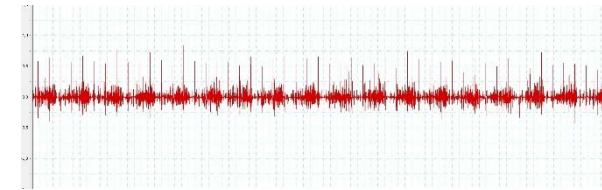

MEP dia

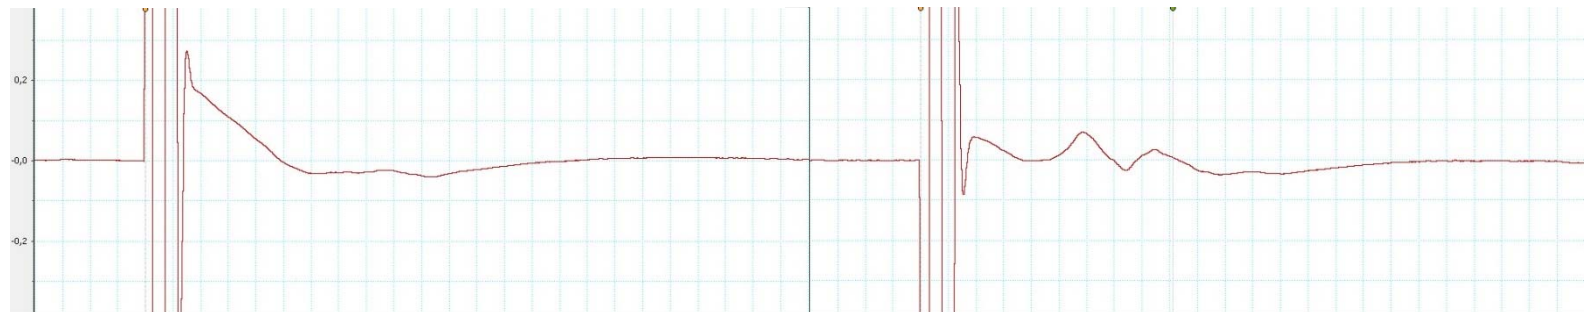



Sham animals

Rat #40

Ipsi

Contra

Diaphragm  
activity

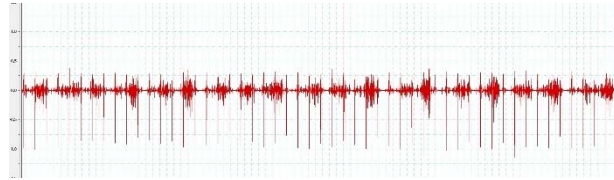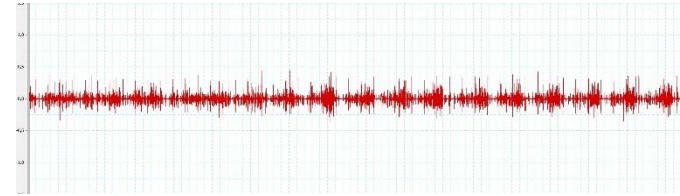

MEP dia

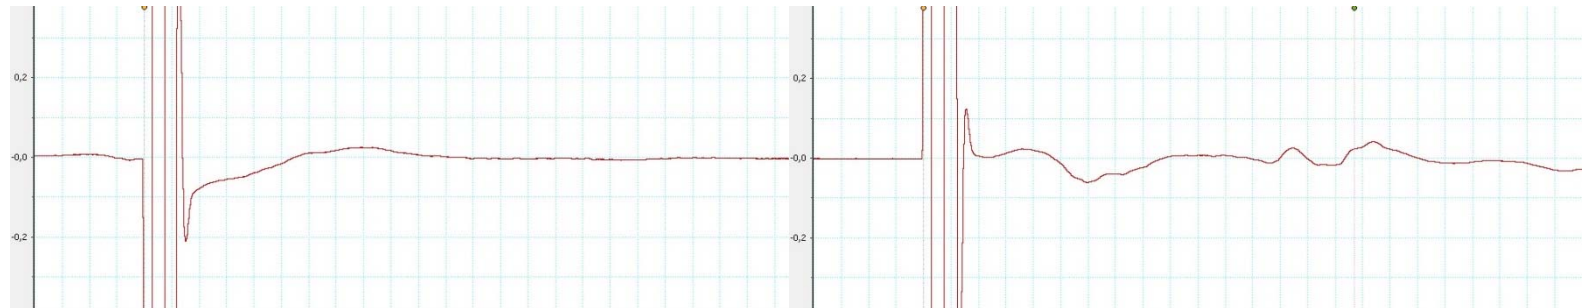

Sham animals

Rat #72

Ipsi

Contra

Diaphragm  
activity

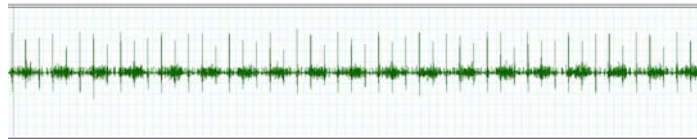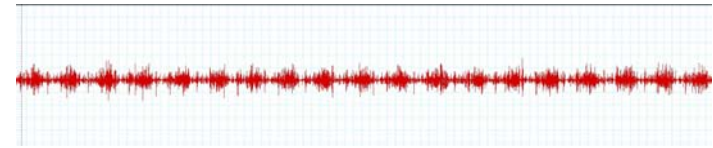

MEP dia

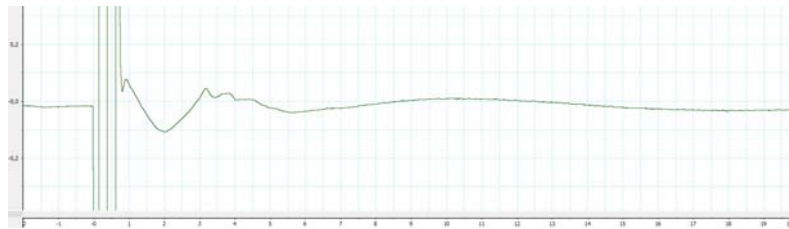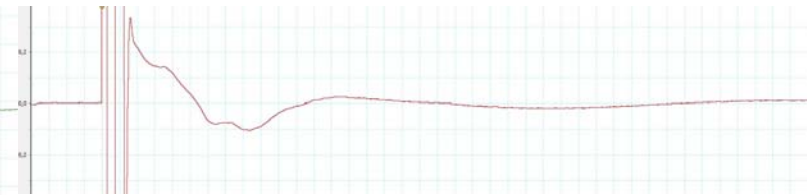

Sham animals

Rat #71

Ipsi

Contra

Diaphragm  
activity

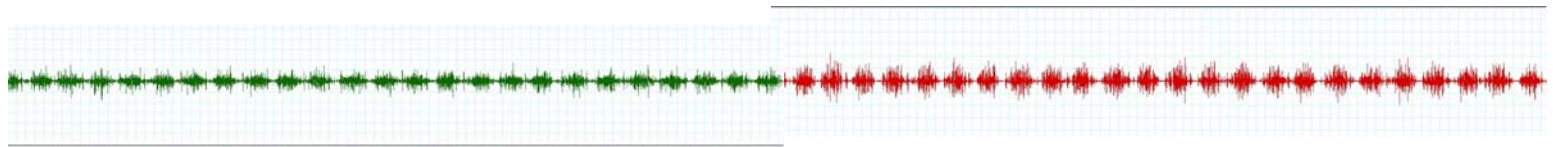

MEP dia

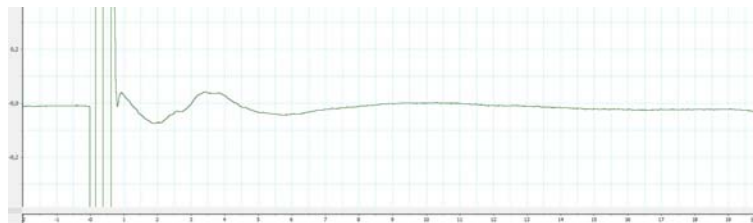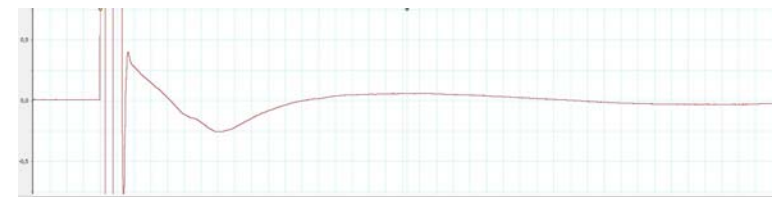

Sham animals

Rat #66

Ipsi

Contra

Diaphragm  
activity

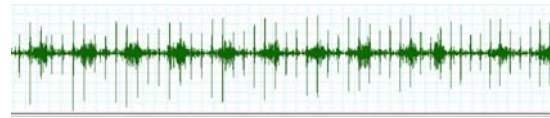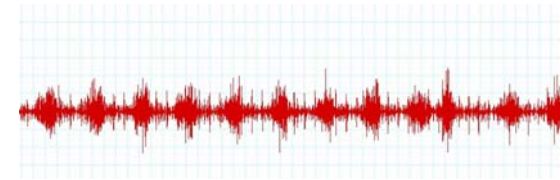

MEP dia

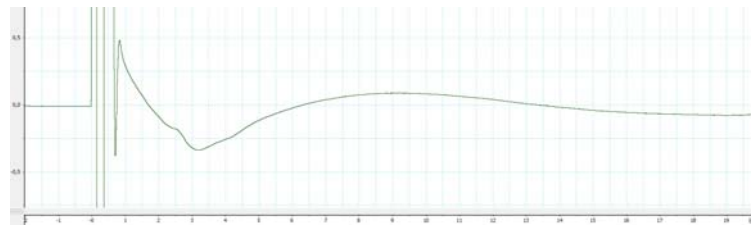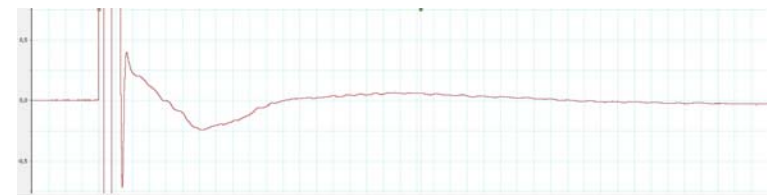

Sham animals

Rat #67

Ipsi

Contra

Diaphragm  
activity

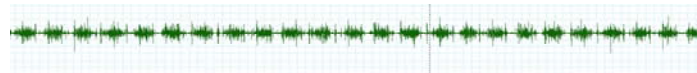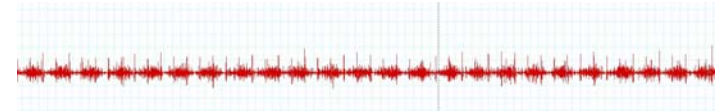

MEP dia

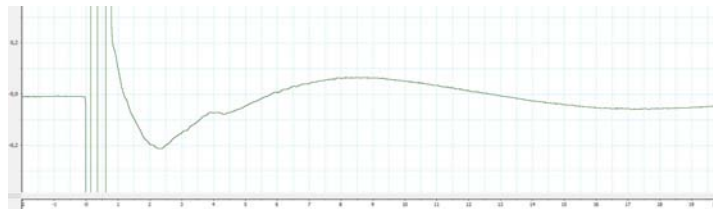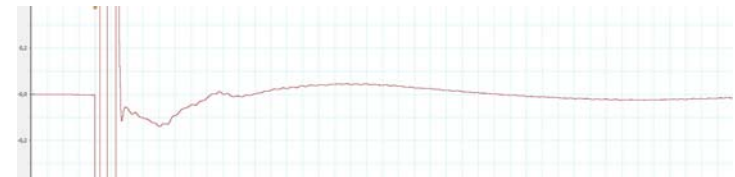

Sham animals

Rat #68

Ipsi

Contra

Diaphragm  
activity

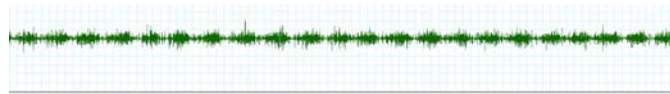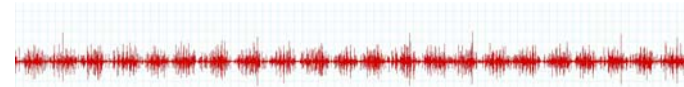

MEP dia

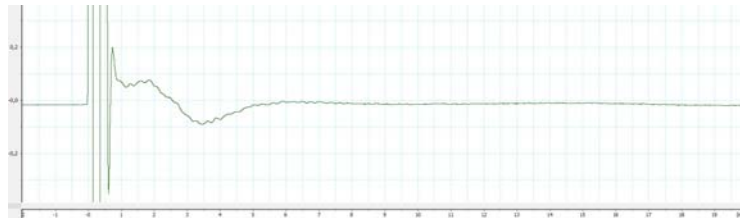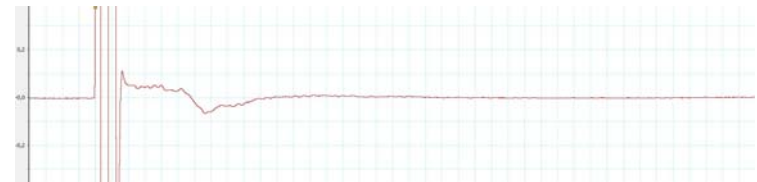

1h P.I.  
Rat #27

Ipsi

Contra

Diaphragm  
activity

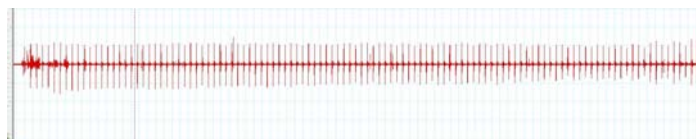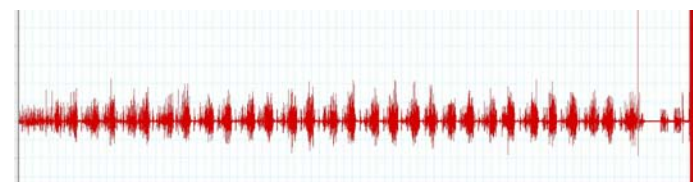

MEP dia

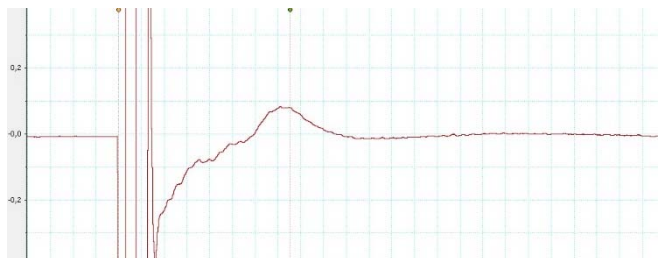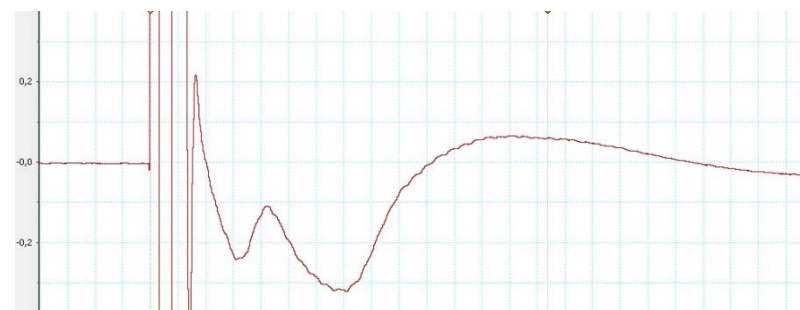

1h P.I.  
Rat #29

Ipsi

Contra

Diaphragm  
activity

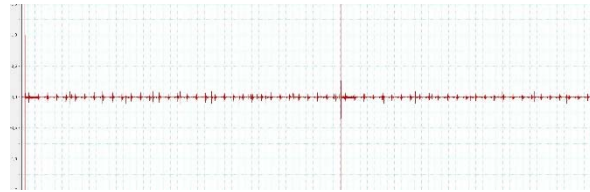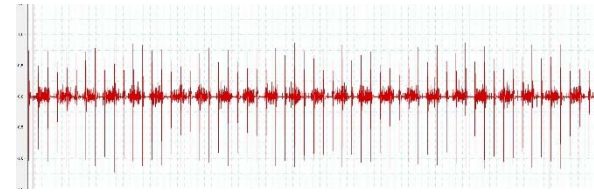

MEP dia

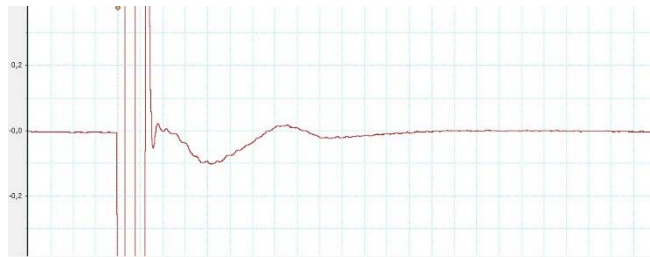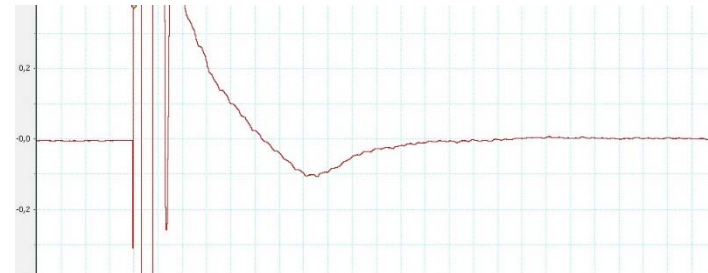



1h P.I.  
Rat #30

Ipsi

Contra

Diaphragm  
activity

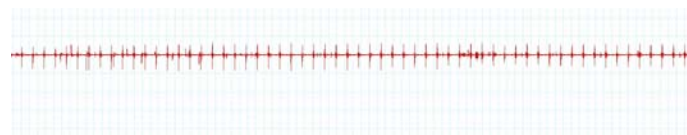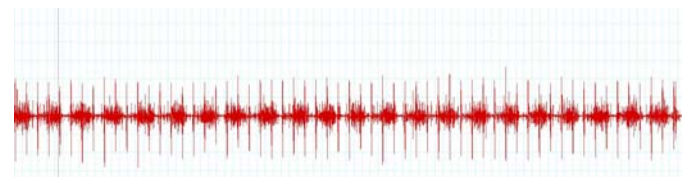

MEP dia

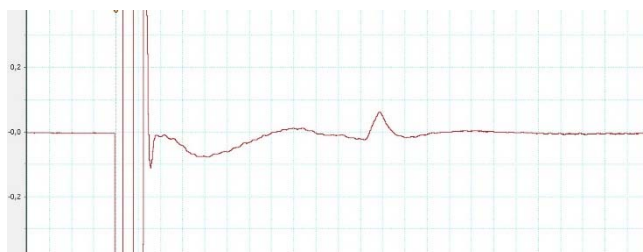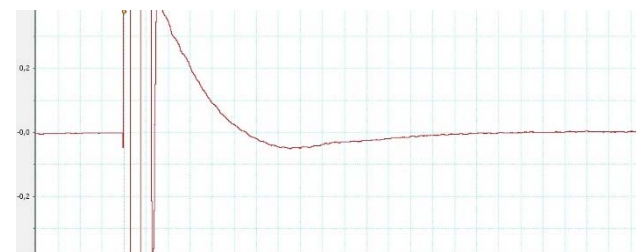

1h P.I.  
Rat #31

Ipsi

Contra

Diaphragm  
activity

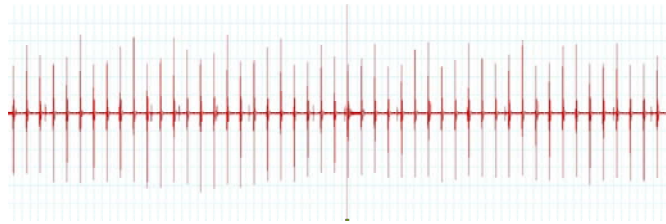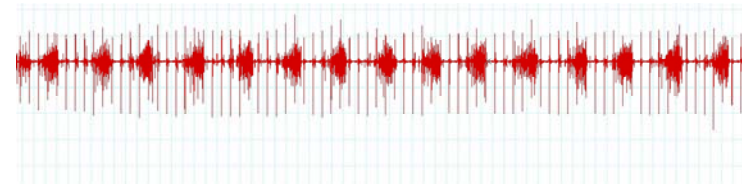

MEP dia

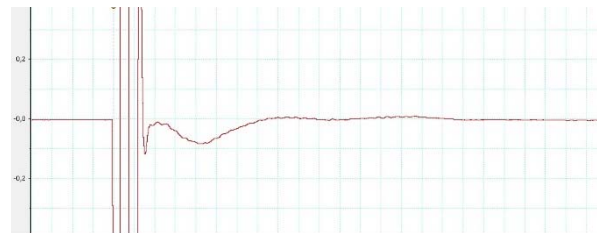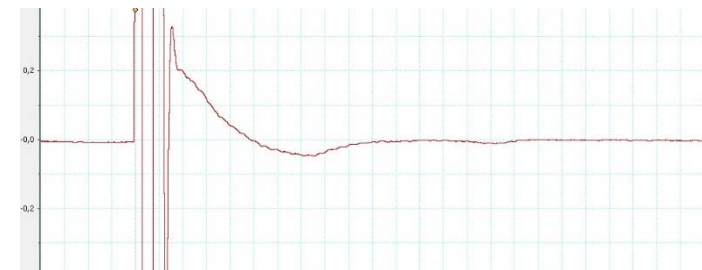

1h P.I.  
Rat #32

Ipsi

Contra

Diaphragm  
activity

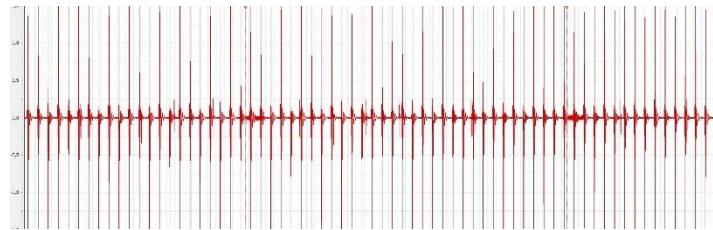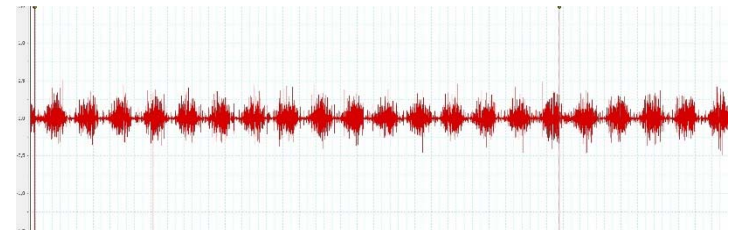

MEP dia

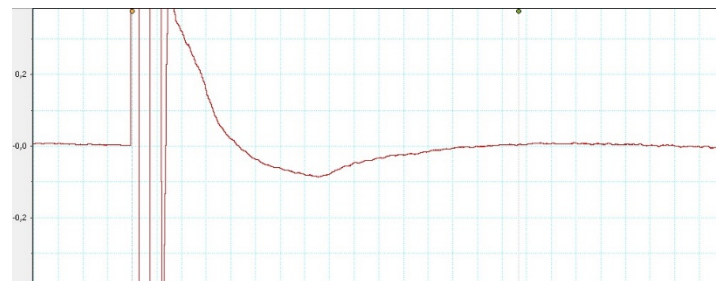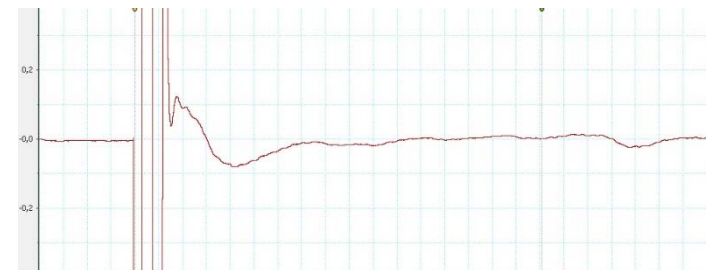

1h P.I.  
Rat #33

Ipsi

Contra

Diaphragm  
activity

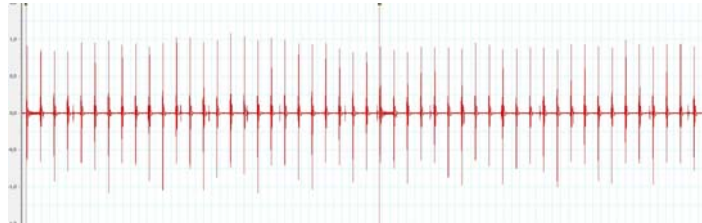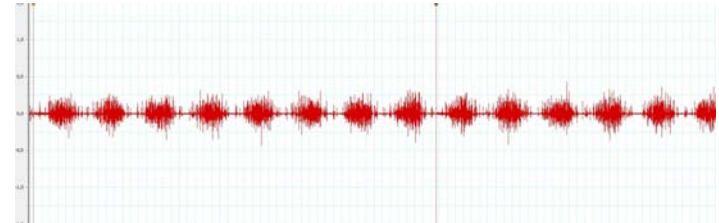

MEP dia

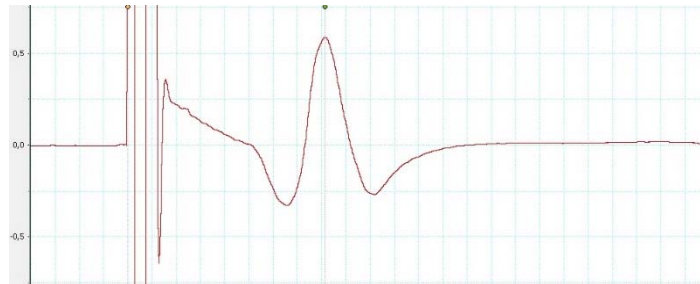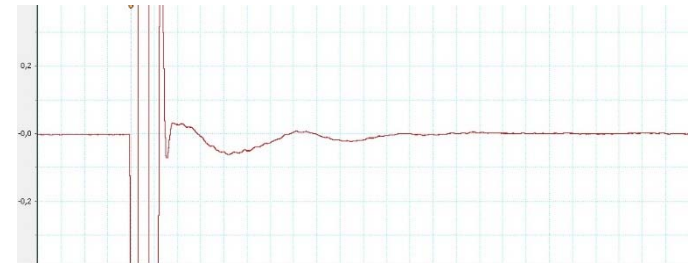

1h P.I.  
Rat #69

Ipsi

Contra

Diaphragm  
activity

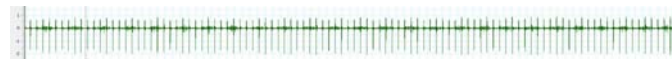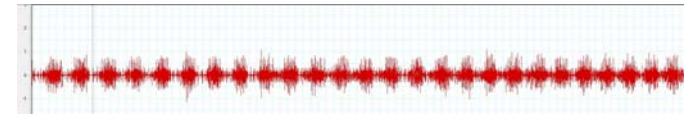

MEP dia

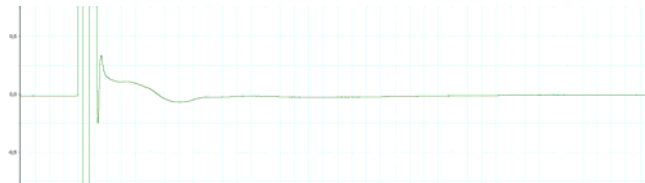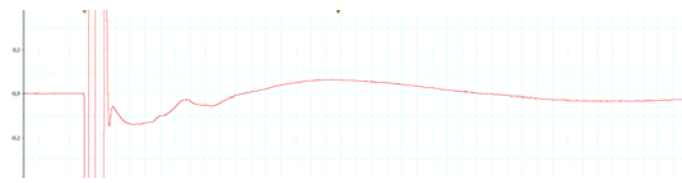

1h P.I.  
Rat #70

Ipsi

Contra

Diaphragm  
activity

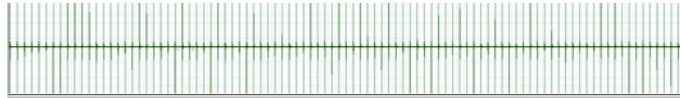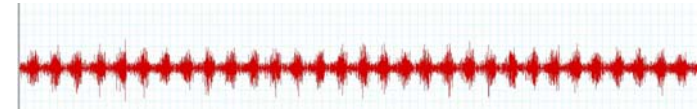

MEP dia

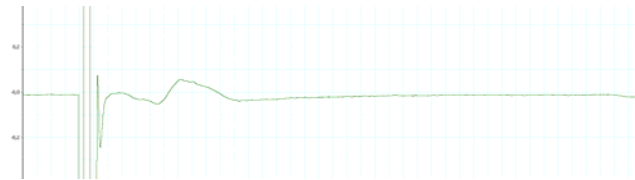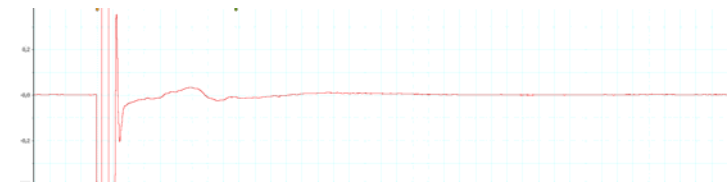

1h P.I.  
Rat #73

Ipsi

Contra

Diaphragm  
activity

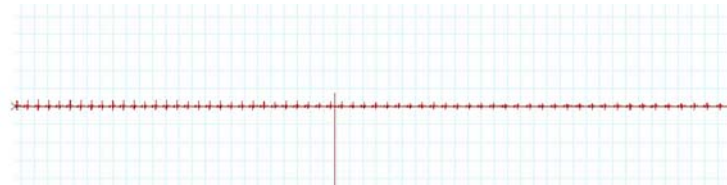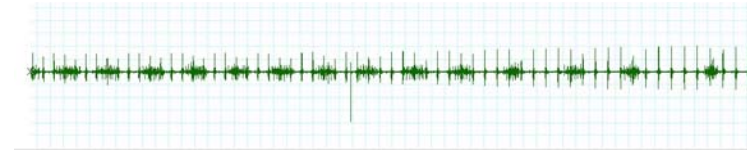

MEP dia

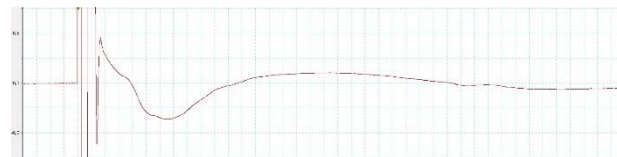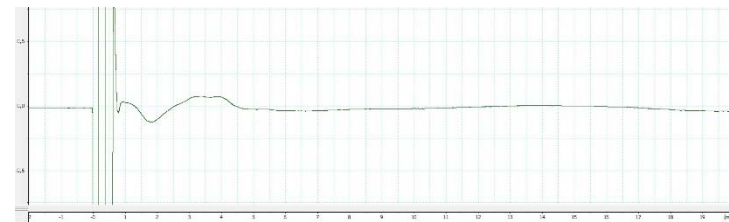

1h P.I.  
Rat #74

Ipsi

Contra

Diaphragm  
activity

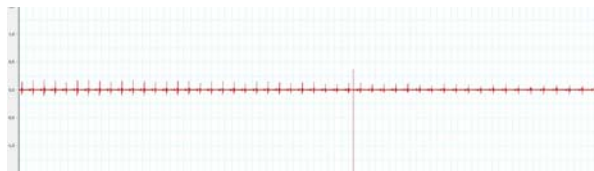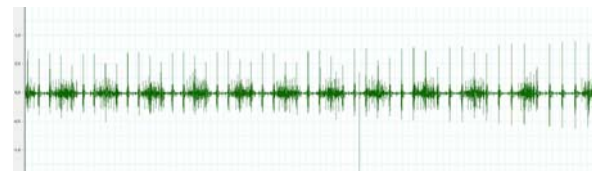

MEP dia

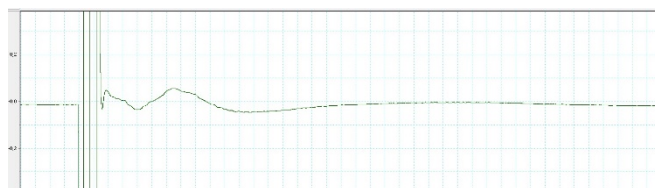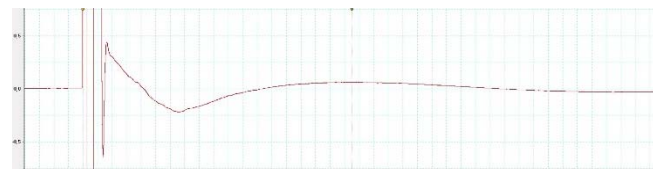



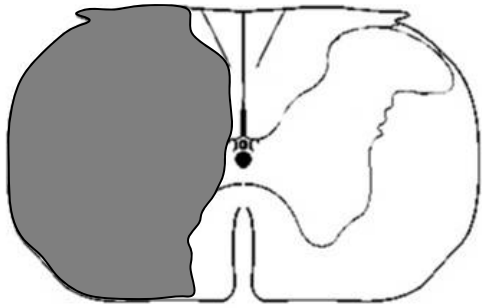

7 d P.I.  
Rat #37

Ipsi

Contra

Diaphragm  
activity

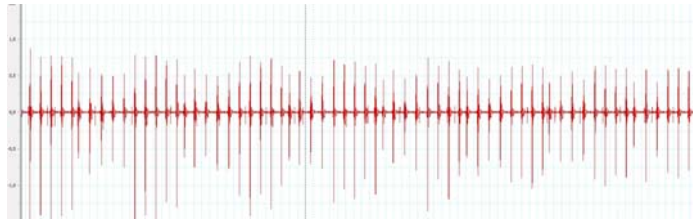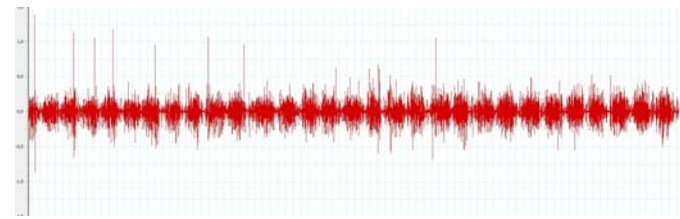

MEP dia

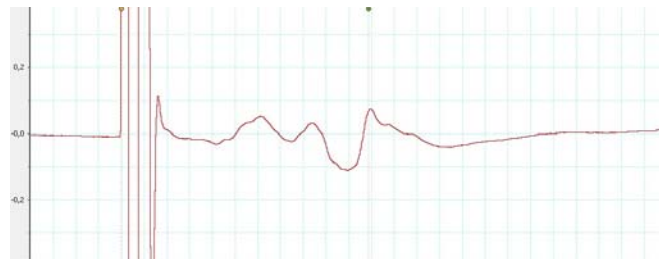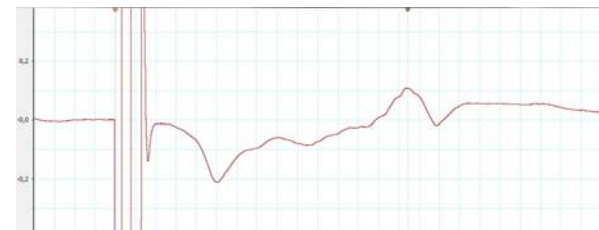

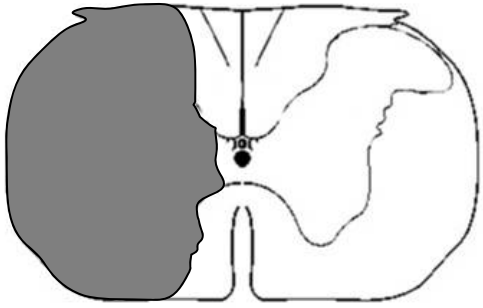

7 d P.I.  
Rat #38

Ipsi

Contra

Diaphragm  
activity

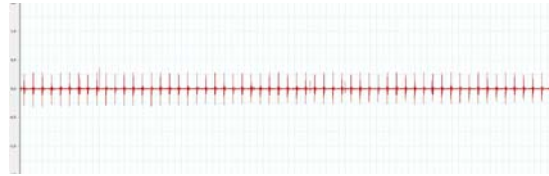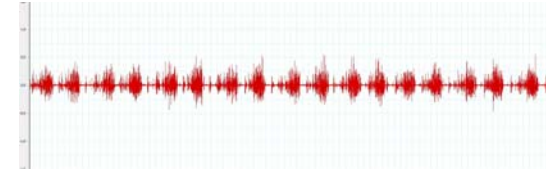

MEP dia

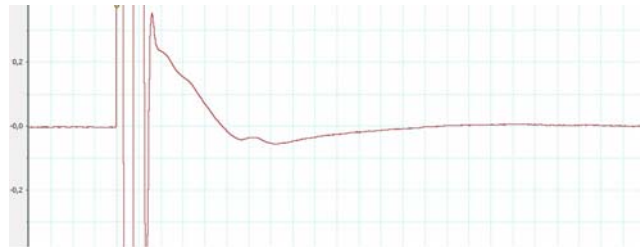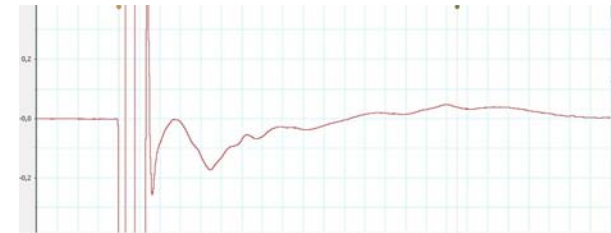

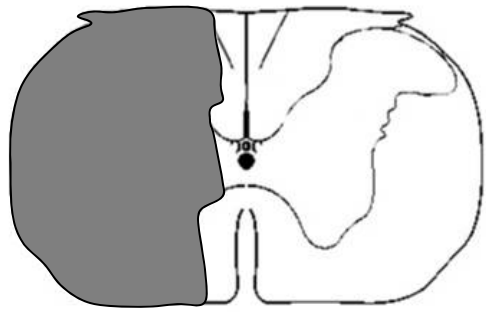

7 d P.I.  
Rat #39

Ipsi

Contra

Diaphragm  
activity

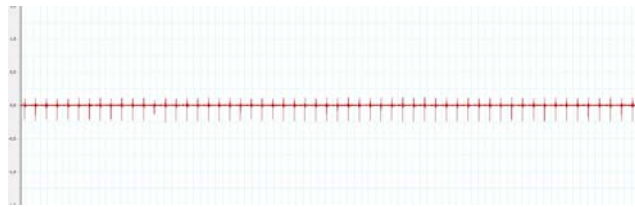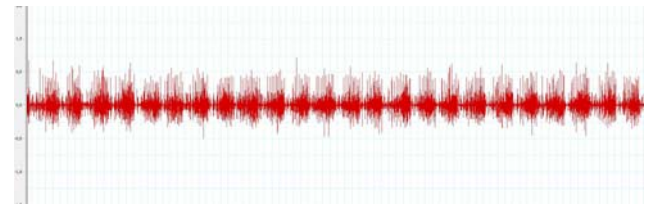

MEP dia

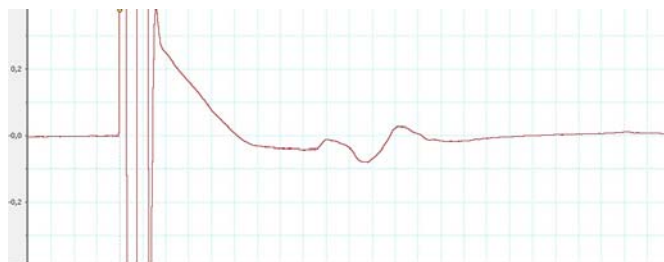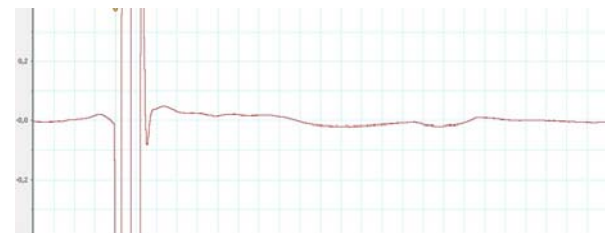

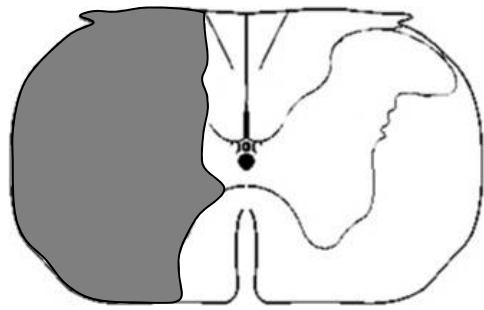

7 d P.I.  
Rat #43

Ipsi

Contra

Diaphragm  
activity

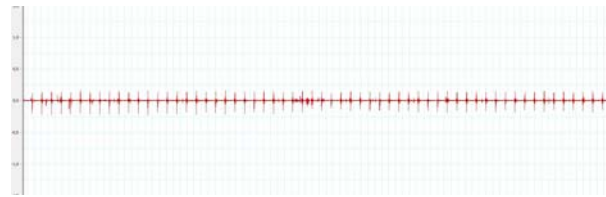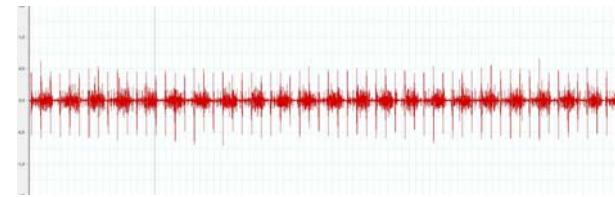

MEP dia

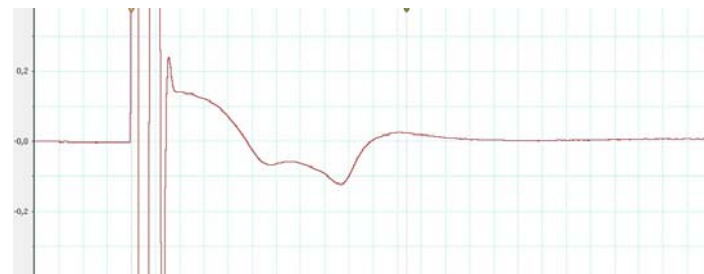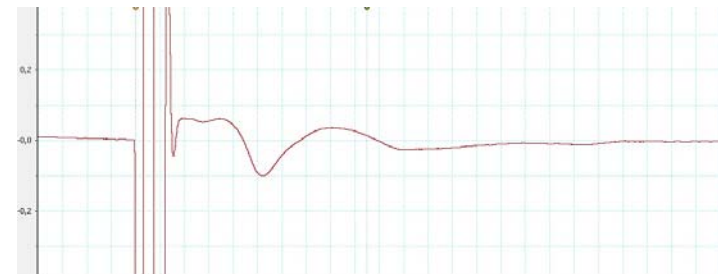

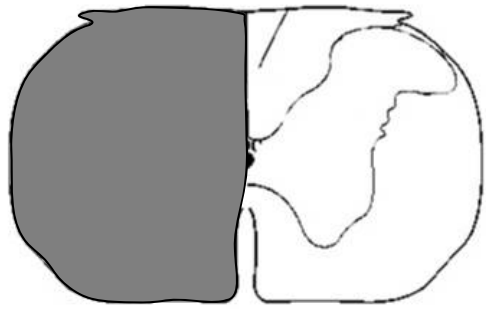

7 d P.I.  
Rat #46

Ipsi

Contra

Diaphragm  
activity

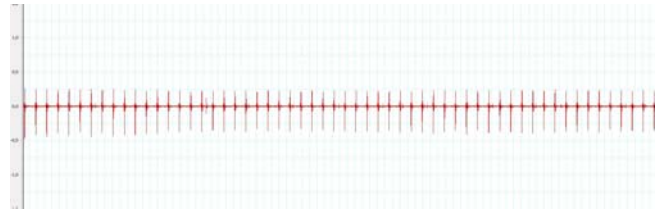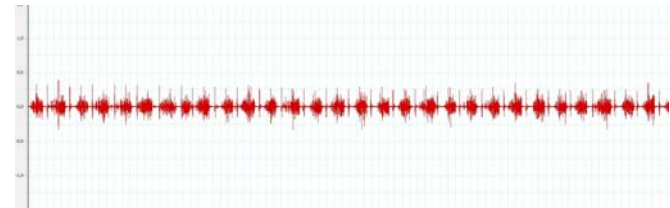

MEP dia

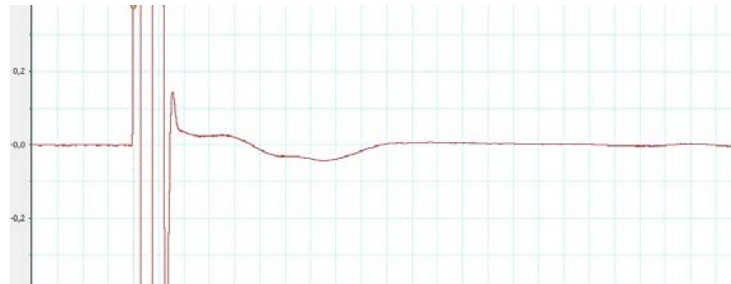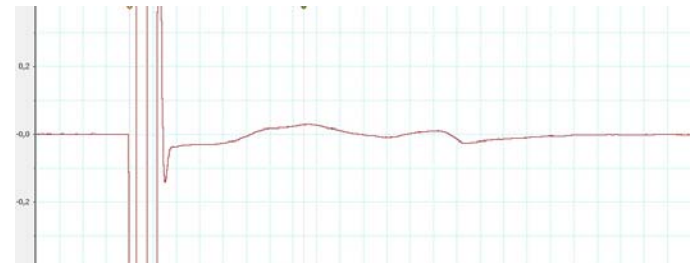

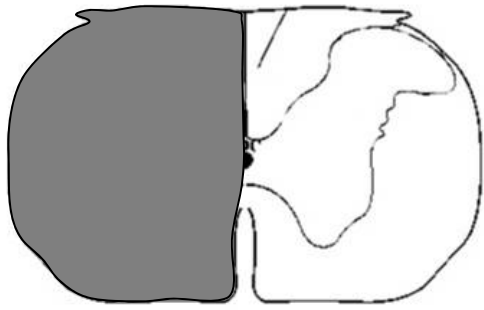

7 d P.I.  
Rat #47

Ipsi

Contra

Diaphragm  
activity

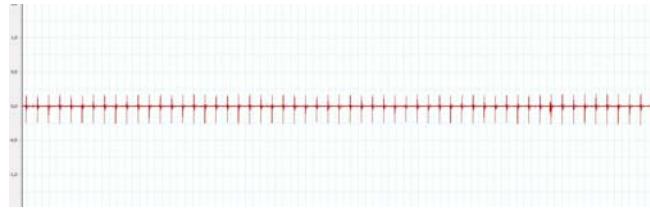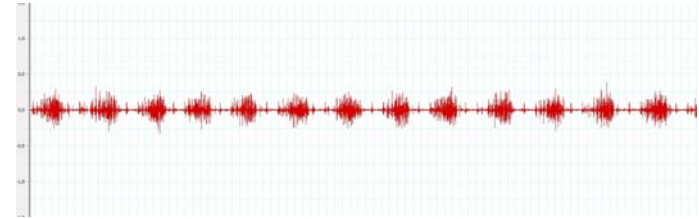

MEP dia

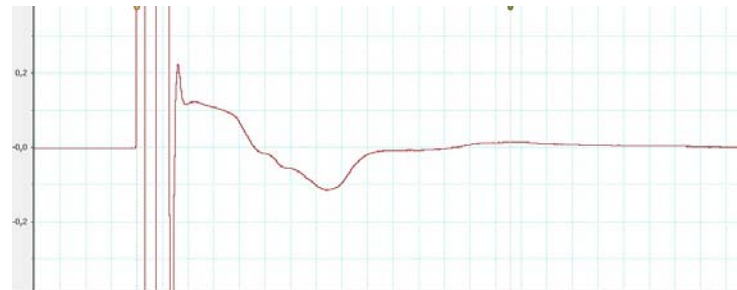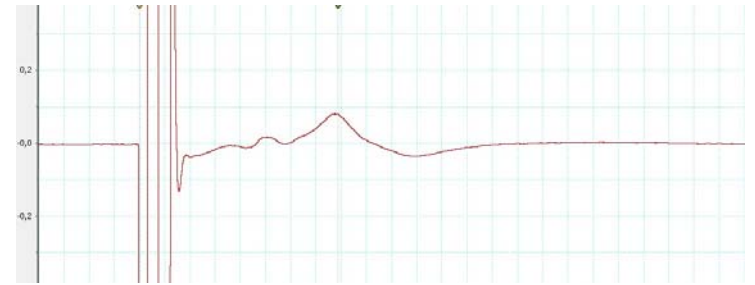

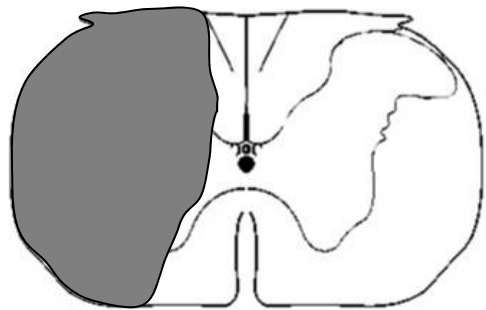

7 d P.I.  
Rat #50

Ipsi

Contra

Diaphragm  
activity

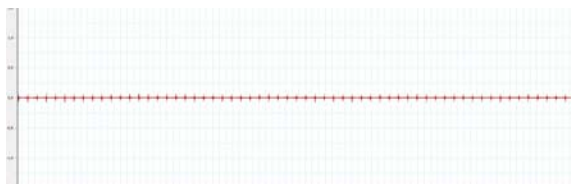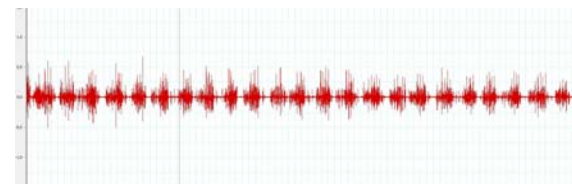

MEP dia

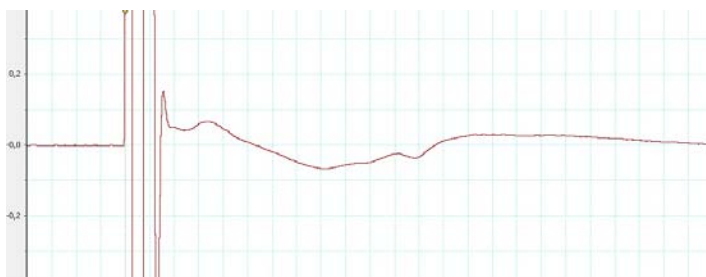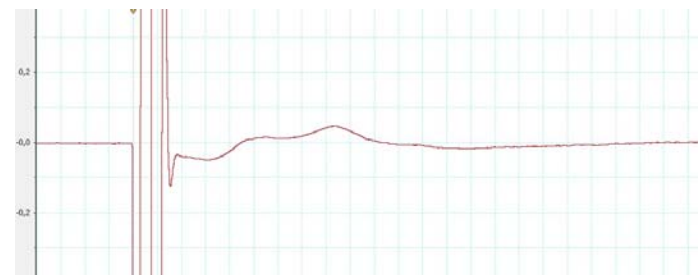

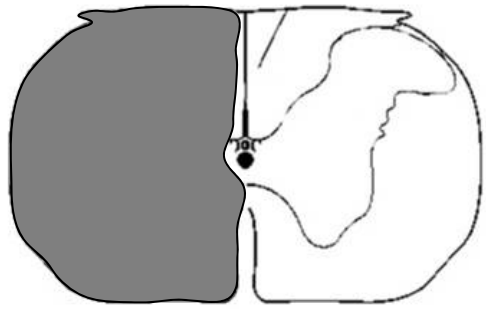

7 d P.I.  
Rat #51

Ipsi

Contra

Diaphragm  
activity

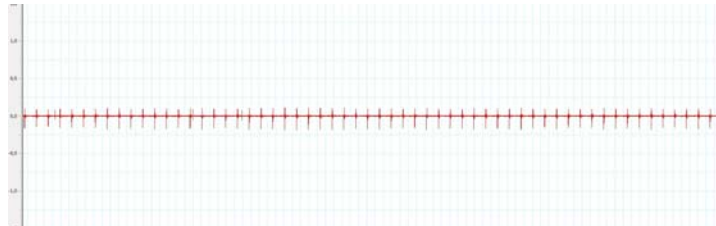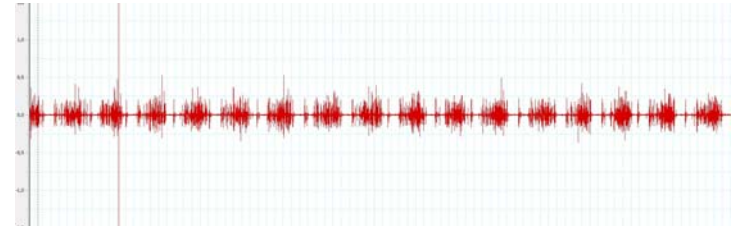

MEP dia

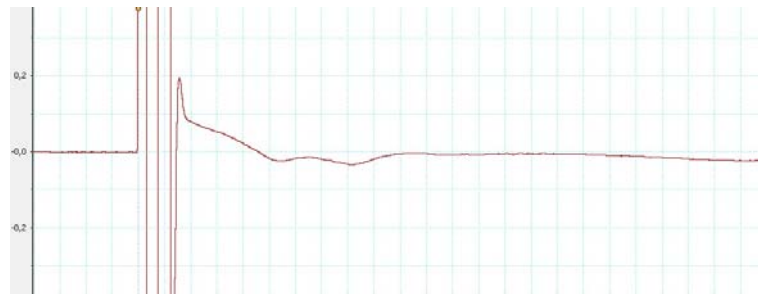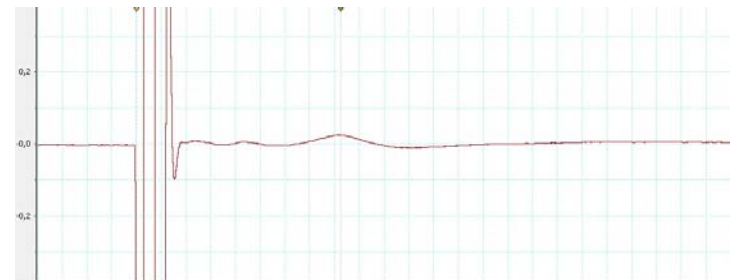

Supplement: pone.0148180.s001.pdf [file pone.0148180.s001.pdf]
